# Supplementary material for: Long-time qingyan formula extract treatment exerts estrogenic activities on reproductive tissues without side effects in ovariectomized rats and via active ER to ERE-independent gene regulation
Source: publisher site journal article supplement (doi:10.18632/aging.102035), 2019-06-19
Supplement: Supplementary file [file aging-v11i12-102035-supplementary-material-SD1.pdf]

## SUPPLEMENTARY FIGURE

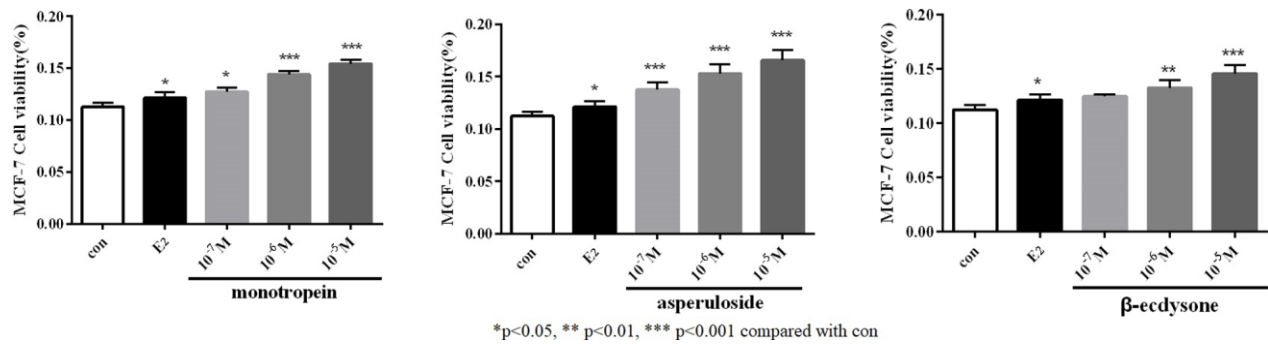

Supplementary Figure 1.
